# Supplementary material
Source: PubMed Central journal article supplement (PMC3982751)
Supplement: supp_pp.113.233387_233387revSupplemental_Files.pdf [file supp_pp.113.233387_233387revSupplemental_Files.pdf]

**Supplemental Figure 1.** The *CDM1* gene and protein structures, mRNA expression levels in wild type and the T-DNA insertional mutant, wild type and *cdm1* mutant siliques phenotype, and genotype of *CDM1* in transgenic line and *cdm1* mutant. (A) A diagram showing the *CDM1* gene structure. Solid boxes indicate exons. The thin line represents the intron. The open triangle indicates the T-DNA insertion (SALK\_065040) site. Below the gene structure, the approximate regions of RT-PCR products were shown for the following primers. fa: oMC7506/oMC7395, and fb: oMC7506/oMC7507. (B) An illustrated *CDM1* protein structure. Two CCCH domains are indicated. The T-DNA insertion disrupts the intact protein after the first CCCH domain (arrow). (C) RT-PCR results with primer pairs of fa and fb for wild type and *cdm1* inflorescences. The ubiquitin gene was used as a control. (D) A dissected wild type silique (upper) shows plenty of seeds inside. No seeds were seen in a *cdm1* mutant silique (lower). (E) PCR results with primer pairs of fa for *CDM1-GR/cdm1* and *cdm1* genomic DNA, showing *CDM1* was detected in the transgenic line.

**Supplemental Figure 2. Comparison of wild type and *cdm1* tapetum development.**

Semi-thin anther sections were stained with toluidine blue, with part of one locule shown in each panel. (A) A stage 7 wild type anther section. (B) A stage 7 *cdm1* anther section. (C) A stage 9 wild type anther section. (D) A stage 9 *cdm1* anther section. Scale bars = 10 um.

**Supplemental Figure 3.** Aniline blue staining for callose in wild type and *cdm1*. (A, C, E and G) bright field; (B, D, F and H) UV light. (A, B) A wild type stage 5 anther section, showing callose was initially deposited on the meiocyte primary wall. (C, D) A *cdm1* stage 5 anther section, showing callose wall was also initially synthesized and deposited

to meiocyte primary wall. Bright field view (E) and UV light view (F) of a wild type tetrad. Bright field view (G) and UV light view (H) of *cdm1* tetrads. Scale bars = 50  $\mu\text{m}$  (A-C), 10  $\mu\text{m}$  (E-H).

**Supplemental Figure 4.** qRT-PCR analyses of different genes expression in wild type and *cdm1* young inflorescences. (A) Expression of *At3g24330*, *At3g55780*, and *At3g61810*. (B) Expression of *MS2*, *DEX1*, *NEF1* and *FLP1*. (C) Expression of *IMPA-8*, *BT3*, *AtPV42a*, *ROXY2*, *KOM*, and *SHT*. *Arabidopsis ACTIN1* was used as a normalizer control. Error bars indicate SD.

**Figure S1**

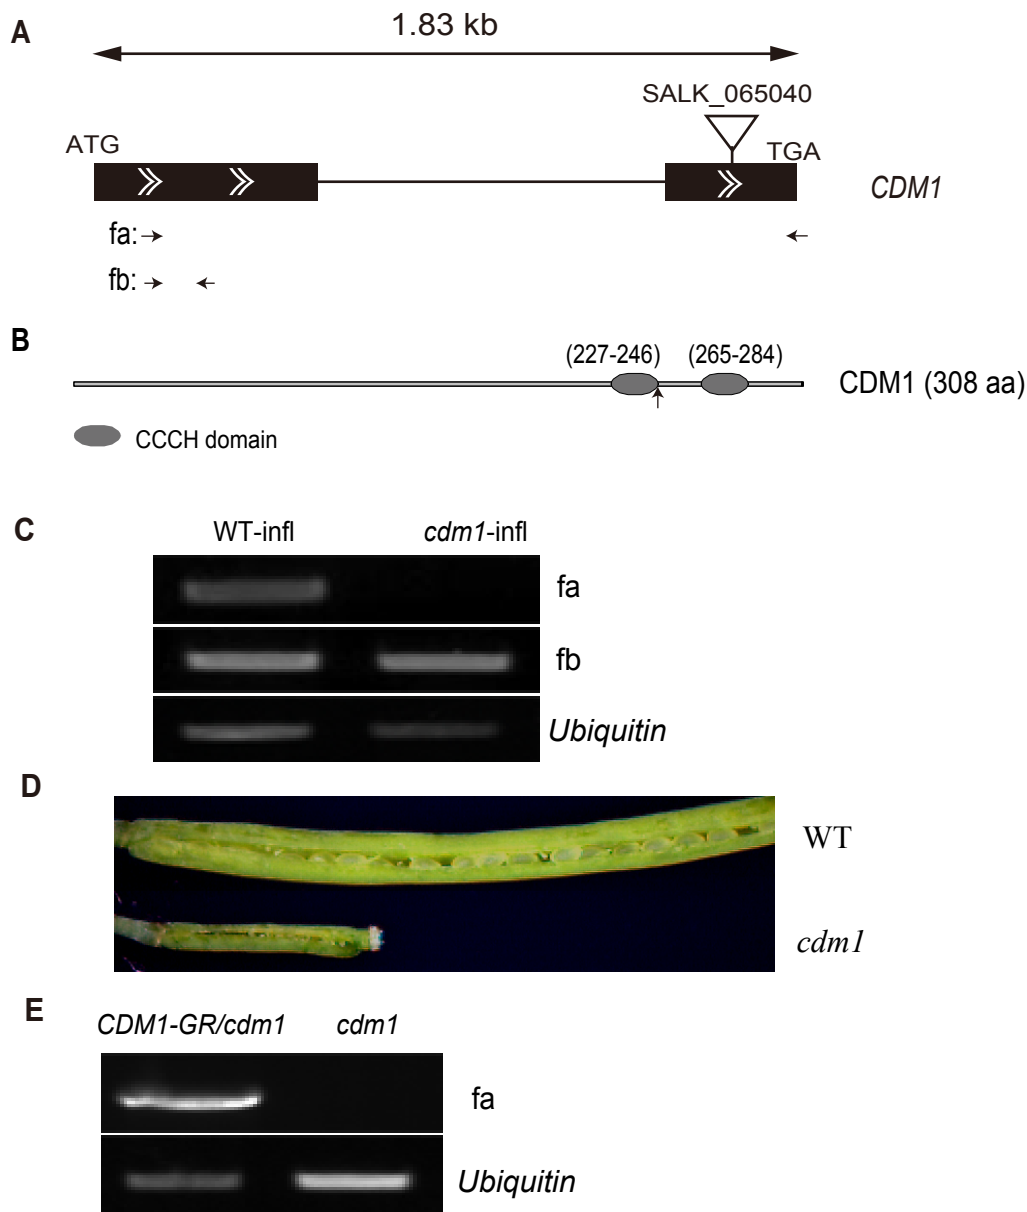

**Supplemental Figure 1. The *CDM1* gene and protein structures, mRNA expression levels in wild type and the T-DNA insertional mutant, wild type and *cdm1* mutant siliques phenotype, and genotype of *CDM1* in transgenic line and *cdm1* mutant.** (A) A diagram showing the *CDM1* gene structure. Solid boxes indicate exons. The thin line represents the intron. The open triangle indicates the T-DNA insertion (SALK\_065040) site. Below the gene structure, the approximate regions of RT-PCR products were shown for the following primers. fa: oMC7506/oMC7395, and fb: oMC7506/oMC7507. (B) An illustrated *CDM1* protein structure. Two CCCH domains are indicated. The T-DNA insertion disrupts the intact protein after the first CCCH domain (arrow). (C) RT-PCR results with primer pairs of fa and fb for wild type and *cdm1* inflorescences. The ubiquitin gene was used as a control. (D) A dissected wild type silique (upper) shows plenty of seeds inside. No seeds were seen in a *cdm1* mutant silique (lower). (E) PCR results with primer pairs of fa for *CDM1-GR/cdm1* and *cdm1* genomic DNA, showing *CDM1* was detected in the transgenic line.

## Figure S2

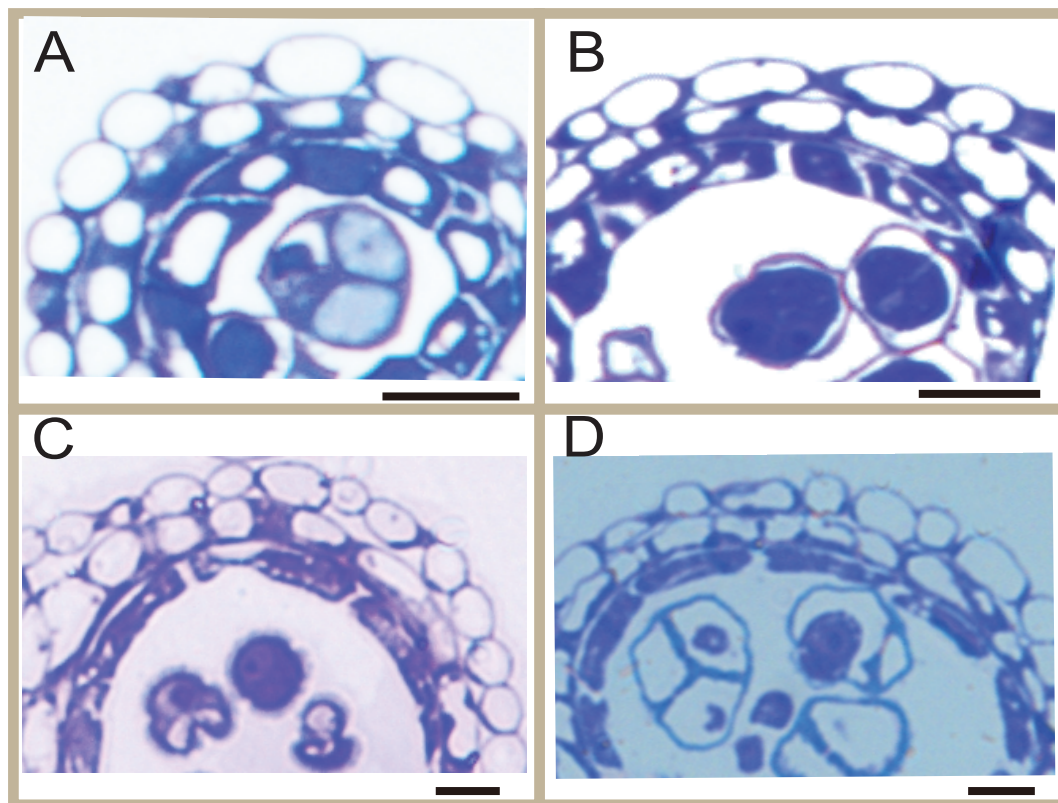

**Supplemental Figure 2. Comparison of wild type and *cdm1* tapetum development.** Semi-thin anther sections were stained with toluidine blue, with part of one locule shown in each panel. (A) A stage 7 wild type anther section. (B) A stage 7 *cdm1* anther section. (C) A stage 9 wild type anther section. (D) A stage 9 *cdm1* anther section. Scale bars = 10  $\mu\text{m}$ .

**Figure S3**

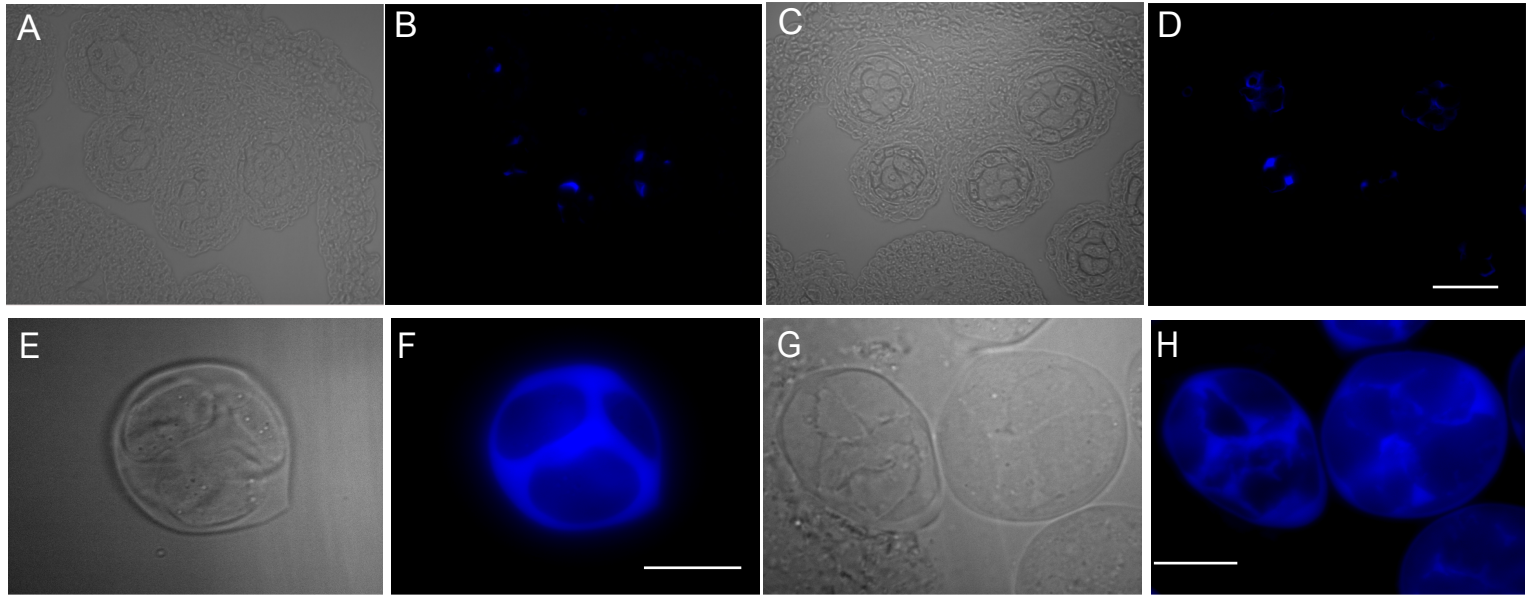

**Supplemental Figure 3. Aniline blue staining for callose in wild type and *cdm1*.**

(A, C, E and G) bright field; (B, D, F and H) UV light. (A, B) A wild type stage 5 anther section, showing callose was initially deposited on the meicyote primary wall. (C, D) A *cdm1* stage 5 anther section, showing callose wall was also initially synthesized and deposited to meicyote primary wall.

Bright field view (E) and UV light view (F) of a wild type tetrad. Bright field view (G) and UV light view (H) of *cdm1* tetrads. Scale bars = 50  $\mu\text{m}$  (A-C), 10  $\mu\text{m}$  (E-H).

# Figure S4

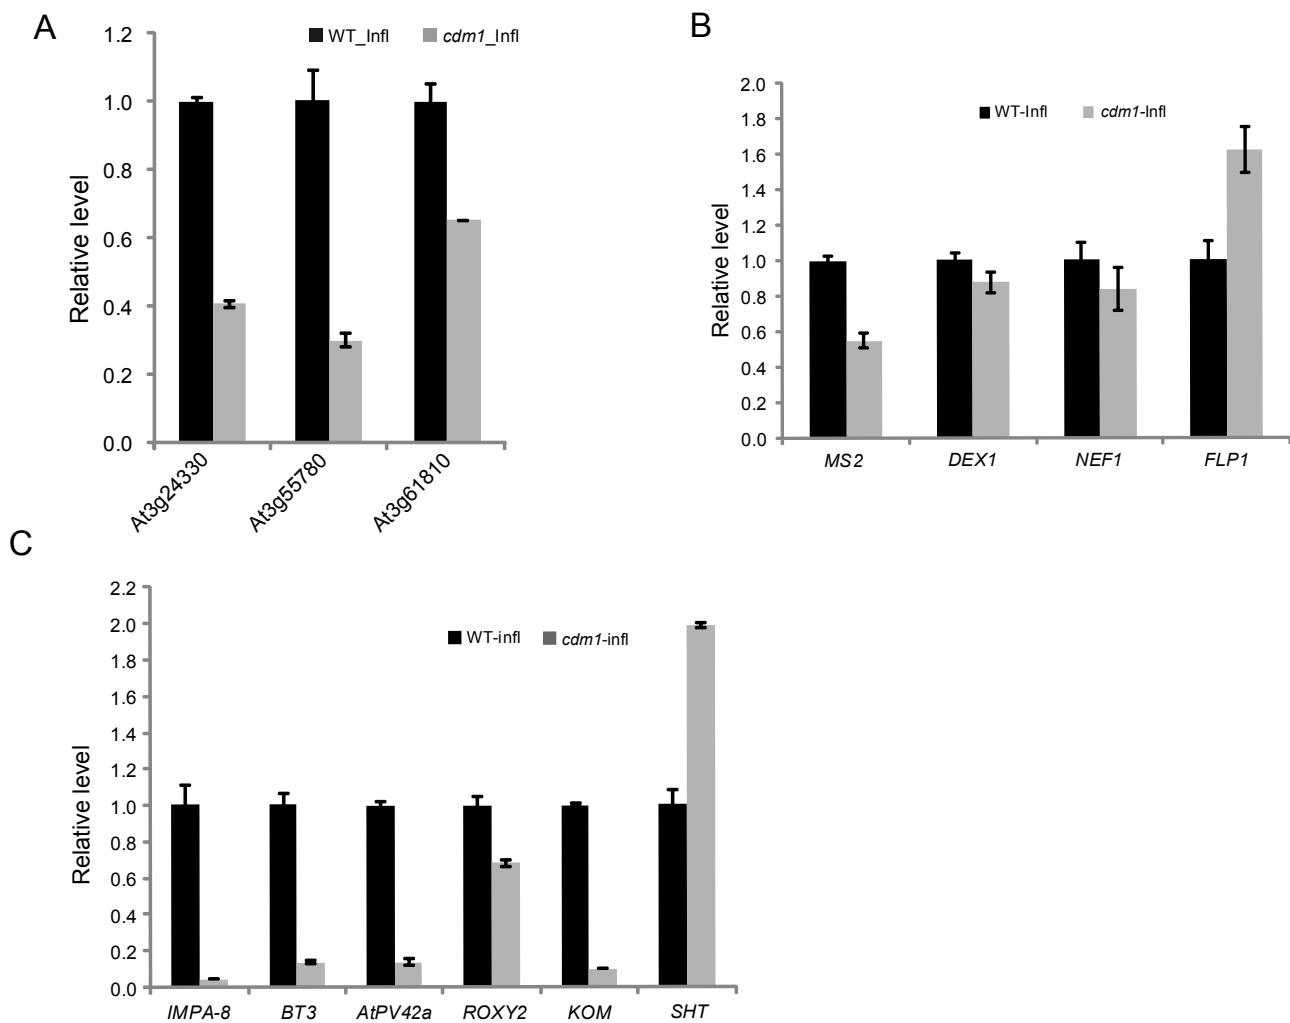

**Supplemental Figure 4. qRT-PCR analyses of different genes expression in wild type and *cdm1* young inflorescences.** (A) Expression of *At3g24330*, *At3g55780*, and *At3g61810*. (B) Expression of *MS2*, *DEX1*, *NEF1* and *FLP1*. (C) Expression of *IMPA-8*, *BT3*, *AtPV42a*, *ROXY2*, *KOM*, and *SHT*. *Arabidopsis ACTIN1* was used as a normalizer control. Error bars indicate SD.

**Supplemental Table 1. Down-regulated genes with expression level changed greater than 1.5-fold in the *cdm1* mutant.**

| Classification                            | Probe ID    | Locus     | Fold change | p-Value  | Anther specific | Gene description                                                           |
|-------------------------------------------|-------------|-----------|-------------|----------|-----------------|----------------------------------------------------------------------------|
| <b>Carbohydrate metabolism</b>            | 265477_at   | At2g46480 | -2.35       | 0.007358 | -               | GAUT2_LGT2__galacturonosyltransferase 2                                    |
|                                           | 267280_at   | At2g19450 | -1.55       | 0.047464 | -               | ABX45_ACYL-COA__diacylglycerol acyltransferase (DGAT)                      |
| <b>Sucrose biosynthesis and transport</b> | 262460_s_at | At1g50390 | -1.60       | 0.026023 | -               | pfkB-like carbohydrate kinase family protein                               |
|                                           | 260517_at   | At1g51420 | -1.53       | 0.000681 | -               | ATSPP1_SPP1__sucrose-phosphatase 1                                         |
| <b>Pectin biosynthesis</b>                | 259033_at   | At3g09410 | -2.19       | 0.002636 | -               | Pectinacetyltransferase family protein                                     |
|                                           | 252221_at   | At3g49830 | -3.46       | 0.017067 | -               | P-loop containing nucleoside triphosphate hydrolases superfamily protein   |
|                                           | 257585_at   | At3g12420 | -2.22       | 0.035580 | Yes             | Polynucleotidyl transferase, ribonuclease H-like superfamily protein       |
|                                           | 261674_at   | At1g18270 | -1.98       | 0.032623 | -               | ketose-bisphosphate aldolase class-II family protein                       |
| <b>Other metabolism</b>                   | 256616_at   | At3g22260 | -1.96       | 0.015817 | -               | Cysteine proteinases superfamily protein                                   |
|                                           | 247381_at   | At5g63390 | -1.91       | 0.000800 | Yes             | O-fucosyltransferase family protein                                        |
|                                           | 262358_at   | At1g73050 | -1.82       | 0.008582 | -               | Glucose-methanol-choline (GMC) oxidoreductase family protein               |
|                                           | 266058_at   | At2g40690 | -1.64       | 0.020323 | -               | GLY1_SFD1__NAD-dependent glycerol-3-phosphate dehydrogenase family protein |
|                                           | 264742_at   | At1g62130 | -1.60       | 0.014134 | Yes             | AAA-type ATPase family protein                                             |
|                                           | 253971_at   | At4g26530 | -1.54       | 0.020109 | -               | Aldolase superfamily protein                                               |
|                                           | 252570_at   | At3g45300 | -1.52       | 0.041414 | -               | ATIVD_IVD_IVDH__isovaleryl-CoA-dehydrogenase                               |
| <b>Hydrolases</b>                         | 266475_at   | At2g31100 | -1.55       | 0.018839 | -               | alpha/beta-Hydrolases superfamily protein                                  |
|                                           | 249323_at   | At5g40940 | -2.45       | 0.037023 | Yes             | FLA20__putative fasciclin-like arabinogalactan protein 20                  |
| <b>Cell wall related</b>                  | 257419_at   | At1g30800 | -1.84       | 0.018650 | Yes             | Fasciclin-like arabinogalactan family protein                              |
|                                           | 262606_at   | At1g15190 | -1.73       | 0.024225 | Yes             | Fasciclin-like arabinogalactan family protein                              |
|                                           | 262393_at   | At1g49490 | -1.50       | 0.032925 | -               | Leucine-rich repeat (LRR) family protein                                   |
|                                           | 247661_at   | At5g60080 | -2.55       | 0.011509 | Yes             | Protein kinase superfamily protein                                         |
| <b>Protein phosphorylation and</b>        | 265168_at   | At1g23700 | -2.54       | 0.006175 | Yes             | Protein kinase superfamily protein                                         |
|                                           | 250699_at   | At5g06820 | -2.39       | 0.012233 | -               | SRF2__STRUBBELIG-receptor family 2                                         |
|                                           | 263416_at   | At2g17170 | -2.07       | 0.003661 | Yes             | Protein kinase superfamily protein                                         |
|                                           | 258095_at   | At3g23610 | -1.99       | 0.011443 | -               | DSPTP1__dual specificity protein phosphatase 1                             |
|                                           | 260239_at   | At1g74360 | -1.95       | 0.014437 | -               | Leucine-rich repeat protein kinase family protein                          |
|                                           | 247831_at   | At5g58540 | -1.94       | 0.005852 | -               | Protein kinase superfamily protein                                         |
|                                           | 247662_at   | At5g60090 | -1.90       | 0.002762 | Yes             | Protein kinase superfamily protein                                         |

**dephosphorylation**

|             |           |       |          |     |                                                                   |
|-------------|-----------|-------|----------|-----|-------------------------------------------------------------------|
| 248441_at   | At5g51270 | -1.85 | 0.043913 | -   | U-box domain-containing protein kinase family protein             |
| 255875_s_at | At2g40500 | -1.74 | 0.000958 | -   | Protein kinase superfamily protein                                |
| 258029_at   | At3g27580 | -1.69 | 0.000404 | -   | ATPK7_D6PKL3__Protein kinase superfamily protein                  |
| 262353_at   | At1g64210 | -1.59 | 0.007509 | -   | Leucine-rich repeat protein kinase family protein                 |
| 248055_at   | At5g55830 | -1.59 | 0.012094 | -   | Concanavalin A-like lectin protein kinase family protein          |
| 249223_at   | At5g42120 | -1.58 | 0.025622 | -   | Concanavalin A-like lectin protein kinase family protein          |
| 255221_at   | At4g05150 | -1.50 | 0.037247 | -   | Octicosapeptide/Phox/Bem1p family protein                         |
| 258667_at   | At3g08750 | -3.90 | 0.009880 | -   | F-box and associated interaction domains-containing protein       |
| 250036_at   | At5g18340 | -3.78 | 0.002464 | -   | ARM repeat superfamily protein                                    |
| 255275_at   | At4g05310 | -3.46 | 0.000400 | -   | Ubiquitin-like superfamily protein                                |
| 267594_at   | At2g33000 | -3.23 | 0.007399 | Yes | Ubiquitin-associated (UBA)/TS-N domain-containing protein-related |
| 255289_at   | At4g04690 | -3.16 | 0.013727 | -   | F-box and associated interaction domains-containing protein       |
| 251441_at   | At3g60020 | -2.79 | 0.010848 | Yes | ASK5_SK5__SKP1-like 5                                             |
| 245902_at   | At5g11080 | -2.65 | 0.001172 | -   | Ubiquitin-like superfamily protein                                |
| 257454_at   | At1g65170 | -2.58 | 0.010566 | -   | Ubiquitin carboxyl-terminal hydrolase family protein              |
| 267598_at   | At2g33010 | -2.38 | 0.013350 | -   | Ubiquitin-associated (UBA) protein                                |
| 266248_at   | At2g27650 | -2.18 | 0.010384 | -   | Ubiquitin carboxyl-terminal hydrolase-related protein             |
| 266564_at   | At2g24000 | -2.03 | 0.044483 | -   | scpl22__serine carboxypeptidase-like 22                           |
| 253716_at   | At4g29420 | -1.89 | 0.008245 | -   | F-box/RNI-like superfamily protein                                |
| 262152_s_at | At1g52450 | -1.88 | 0.024952 | Yes | Ubiquitin carboxyl-terminal hydrolase-related protein             |
| 255426_at   | At4g03370 | -1.85 | 0.003180 | -   | Ubiquitin family protein                                          |
| 257920_at   | At3g23260 | -1.65 | 0.020889 | -   | F-box and associated interaction domains-containing protein       |
| 251440_at   | At3g60010 | -1.54 | 0.017912 | -   | ASK13_SK13__SKP1-like 13                                          |
| 251366_at   | At3g61340 | -1.52 | 0.041065 | -   | F-box and associated interaction domains-containing protein       |
| 247670_at   | At5g60190 | -1.50 | 0.018049 | -   | Cysteine proteinases superfamily protein                          |

**Proteolysis****Protein biosynthesis**

|             |           |       |          |   |                                                                               |
|-------------|-----------|-------|----------|---|-------------------------------------------------------------------------------|
| 259776_s_at | At1g29550 | -1.66 | 0.014933 | - | Eukaryotic initiation factor 4E protein                                       |
| 249338_at   | At5g41090 | -4.03 | 0.006421 | - | NAC095__NAC domain containing protein 95                                      |
| 266111_at   | At2g02060 | -3.51 | 0.003879 | - | Homeodomain-like superfamily protein                                          |
| 264273_s_at | At1g60300 | -3.44 | 0.004057 | - | NAC (No Apical Meristem) domain transcriptional regulator superfamily protein |
| 246556_at   | At5g15480 | -3.36 | 0.005884 | - | C2H2-type zinc finger family protein                                          |
| 255416_at   | At4g03170 | -2.93 | 0.003360 | - | AP2/B3-like transcriptional factor family protein                             |
| 264269_at   | At1g60240 | -2.43 | 0.005376 | - | NAC (No Apical Meristem) domain transcriptional regulator superfamily protein |
| 246788_at   | At5g27580 | -2.21 | 0.019461 | - | AGL89__AGAMOUS-like 89                                                        |



|                                      |             |           |       |          |     |                                                                                                        |
|--------------------------------------|-------------|-----------|-------|----------|-----|--------------------------------------------------------------------------------------------------------|
|                                      | 257369_at   | At2g35550 | -1.93 | 0.013883 | -   | ATBPC7_BBR_BPC7__basic pentacysteine 7                                                                 |
|                                      | 257400_s_at | At1g23810 | -1.91 | 0.022893 | Yes | Paired amphipathic helix (PAH2) superfamily protein                                                    |
| <b>Transcription factor</b>          | 246962_s_at | At5g24800 | -1.80 | 0.034770 | -   | ATBZIP9_BZIP9_BZO2H2__basic leucine zipper 9                                                           |
|                                      | 260998_at   | At1g26590 | -1.77 | 0.003977 | -   | C2H2-like zinc finger protein                                                                          |
|                                      | 255903_at   | At1g17950 | -1.77 | 0.026746 | -   | ATMYB52_BW52_MYB52__myb domain protein 52                                                              |
|                                      | 259992_at   | At1g67970 | -1.76 | 0.017012 | -   | AT-HSFA8_HSFA8__heat shock transcription factor A8                                                     |
|                                      | 249463_s_at | At5g39690 | -1.75 | 0.023771 | -   | ANAC093_NAC093__NAC domain containing protein 93                                                       |
|                                      | 264726_at   | At1g22985 | -1.67 | 0.015306 | -   | ERF (ethylene response factor) subfamily B-5 of ERF/AP2 transcription factor family protein            |
|                                      | 249419_s_at | At5g39810 | -1.65 | 0.024250 | -   | AGL98__AGAMOUS-like 98                                                                                 |
|                                      | 253064_at   | At4g37730 | -1.63 | 0.010177 | -   | AtbZIP7_bZIP7__basic leucine-zipper 7                                                                  |
|                                      | 257930_at   | At3g17010 | -1.60 | 0.014006 | -   | AP2/B3-like transcriptional factor family protein                                                      |
|                                      | 256742_at   | At3g29380 | -1.54 | 0.021275 | -   | TFIIB-related protein                                                                                  |
|                                      | 263378_at   | At2g40180 | -2.80 | 0.007484 | -   | ATHPP2C5_PP2C5__phosphatase 2C5                                                                        |
|                                      | 257460_at   | At1g75580 | -1.83 | 0.003798 | -   | SAUR-like auxin-responsive protein family                                                              |
| <b>Hormone response</b>              | 266139_at   | At2g28085 | -1.75 | 0.034852 | -   | SAUR-like auxin-responsive protein family                                                              |
|                                      | 252367_at   | At3g48360 | -1.62 | 0.042039 | -   | ATBT2_ TAZ domain protein 2; an essential component of the TAC1-mediated telomerase activation pathway |
|                                      | 253439_at   | At4g32540 | -1.53 | 0.002151 | -   | Flavin Monooxygenase-Like Enzyme                                                                       |
|                                      | 249706_at   | At5g35600 | -2.47 | 0.011046 | Yes | HDA7__histone deacetylase7                                                                             |
| <b>Histone deacetylation</b>         | 246881_at   | At5g26040 | -1.53 | 0.018619 | -   | HDA2__histone deacetylase 2                                                                            |
|                                      | 254946_at   | At4g10950 | -4.41 | 0.000107 | Yes | SGNH hydrolase-type esterase superfamily protein                                                       |
| <b>Fatty acid-lipid biosynthesis</b> | 251255_at   | At3g62280 | -1.81 | 0.003385 | -   | GDSL-like Lipase/Acylhydrolase superfamily protein                                                     |
|                                      | 263482_at   | At2g03980 | -1.54 | 0.026602 | -   | GDSL-like Lipase/Acylhydrolase superfamily protein                                                     |
|                                      | 249645_at   | At5g36910 | -3.11 | 0.009242 | -   | THI2.2__thionin 2.2                                                                                    |
|                                      | 262366_at   | At1g72890 | -2.16 | 0.004510 | -   | Disease resistance protein (TIR-NBS class)                                                             |
|                                      | 267191_at   | At2g44110 | -2.01 | 0.036977 | -   | ATMLO15_MLO15__Seven transmembrane MLO family protein                                                  |
| <b>Stress response</b>               | 255331_at   | At4g04330 | -1.79 | 0.001871 | -   | Chaperonin-like RbcX protein                                                                           |
|                                      | 253627_at   | At4g30650 | -1.67 | 0.048294 | -   | Low temperature and salt responsive protein family                                                     |
|                                      | 253313_at   | At4g33870 | -1.59 | 0.003748 | Yes | Peroxidase superfamily protein                                                                         |
|                                      | 251919_at   | At3g53800 | -1.58 | 0.026771 | -   | Orthologs of the human Hsp70-binding protein 1 (HspBP-1) and yeast Fes1p                               |
|                                      | 263275_at   | At2g14170 | -1.53 | 0.029790 | -   | ALDH6B2__aldehyde dehydrogenase 6B2                                                                    |
| <b>Electron transport</b>            | 262793_at   | At1g13110 | -1.75 | 0.002886 | -   | CYP71B7__cytochrome P450, family 71 subfamily B, polypeptide 7                                         |
|                                      | 265227_s_at | At2g07695 | -1.57 | 0.047555 | -   | Cytochrome C oxidase subunit II-like, transmembrane domain                                             |

|                                      |           |           |       |          |     |                                                                                                    |
|--------------------------------------|-----------|-----------|-------|----------|-----|----------------------------------------------------------------------------------------------------|
| <b>Ion transport</b>                 | 262213_at | At1g74870 | -3.59 | 0.000211 | -   | RING/U-box superfamily protein                                                                     |
|                                      | 246968_at | At5g24870 | -1.82 | 0.005574 | -   | RING/U-box superfamily protein                                                                     |
|                                      | 257380_at | At2g28090 | -1.64 | 0.001059 | Yes | Heavy metal transport/detoxification superfamily protein                                           |
| <b>Oligopeptide transport</b>        | 265323_at | At2g18260 | -3.58 | 0.003220 | -   | ATSYP112_SYP112__syntaxin of plants 112                                                            |
|                                      | 249535_at | At5g38820 | -2.20 | 0.004263 | -   | Transmembrane amino acid transporter family protein                                                |
| <b>Other transporters</b>            | 250052_at | At5g17830 | -4.60 | 0.003411 | Yes | Plasma-membrane choline transporter family protein                                                 |
|                                      | 258835_at | At3g07250 | -1.92 | 0.025338 | Yes | nuclear transport factor 2 (NTF2) family protein / RNA recognition motif (RRM)-containing protein  |
|                                      | 257593_at | At3g24840 | -1.58 | 0.001935 | -   | Sec14p-like phosphatidylinositol transfer family protein                                           |
| <b>Meiosis</b>                       | 254435_at | At4g20900 | -4.75 | 0.002234 | -   | MS5_TDM1__Tetratricopeptide repeat (TPR)-like superfamily protein                                  |
|                                      | 256517_at | At1g66170 | -2.61 | 0.036614 | Yes | MMD1__RING/FYVE/PHD zinc finger superfamily protein                                                |
|                                      | 265266_at | At2g42890 | -1.65 | 0.036979 | -   | AML2_ML2__MEI2-like 2                                                                              |
|                                      | 248699_at | At5g48390 | -1.63 | 0.012743 | -   | AtZIP4. Defective in meiotic chromosome segregation                                                |
|                                      | 245419_at | At4g17380 | -1.61 | 0.000938 | Yes | ATMSH4_MSH4_MSH4__MUTS-like protein 4                                                              |
| <b>RNA binding protein</b>           | 248215_at | At5g53680 | -4.35 | 0.002879 | -   | RNA-binding (RRM/RBD/RNP motifs) family protein                                                    |
|                                      | 259377_at | At3g16380 | -2.04 | 0.000327 | -   | PAB6__poly(A) binding protein 6                                                                    |
|                                      | 265205_at | At2g36660 | -1.79 | 0.017115 | -   | PAB7__poly(A) binding protein 7                                                                    |
|                                      | 259864_at | At1g72800 | -1.73 | 0.009746 | -   | RNA-binding (RRM/RBD/RNP motifs) family protein                                                    |
|                                      | 265449_at | At2g46610 | -1.58 | 0.001481 | -   | RNA-binding (RRM/RBD/RNP motifs) family protein                                                    |
| <b>Nucleic acid binding(other)</b>   | 259494_at | At1g15850 | -2.77 | 0.000521 | -   | Transducin/WD40 repeat-like superfamily protein                                                    |
|                                      | 248278_at | At5g52890 | -2.01 | 0.031900 | -   | AT hook motif-containing protein                                                                   |
|                                      | 259552_at | At1g21320 | -1.72 | 0.007079 | -   | nucleotide binding;nucleic acid binding                                                            |
|                                      | 264971_at | At1g67210 | -1.65 | 0.023200 | -   | Proline-rich spliceosome-associated (PSP) family protein / zinc knuckle (CCHC-type) family protein |
| <b>Anther and pollen development</b> | 248390_at | At5g52000 | -3.35 | 0.033601 | -   | IMPA-8__importin alpha isoform 8                                                                   |
|                                      | 257451_at | At1g05690 | -2.95 | 0.002348 | -   | BT3__BTB and TAZ domain protein 3                                                                  |
|                                      | 262580_at | At1g15330 | -2.85 | 0.025430 | -   | Cystathionine beta-synthase (CBS) protein                                                          |
|                                      | 250223_at | At5g14070 | -1.54 | 0.021751 | -   | glutaredoxin ROXY2                                                                                 |
|                                      | 262178_at | At1g77860 | -1.51 | 0.028109 | -   | KOM__Rhomboid-related intramembrane serine protease family protein                                 |
| <b>Cyclin</b>                        | 251651_at | At3g57370 | -2.97 | 0.014788 | Yes | Cyclin family protein                                                                              |

**Cyclin**

|           |           |       |          |   |                                     |
|-----------|-----------|-------|----------|---|-------------------------------------|
| 245043_at | At2g26430 | -1.53 | 0.010804 | - | ATRCY1_RCY1__arginine-rich cyclin 1 |
|-----------|-----------|-------|----------|---|-------------------------------------|

**Putative beta-1, 3-glucanase**

|           |           |       |          |     |                                                    |
|-----------|-----------|-------|----------|-----|----------------------------------------------------|
| 257165_at | At3g24330 | -2.08 | 0.034071 | Yes | O-Glycosyl hydrolases family 17 protein            |
| 251754_at | At3g55780 | -1.77 | 0.012575 | Yes | Glycosyl hydrolase superfamily protein             |
| 261004_at | At1g26450 | -1.70 | 0.004230 | -   | Carbohydrate-binding X8 domain superfamily protein |
| 251280_at | At3g61810 | -1.60 | 0.001122 | -   | Glycosyl hydrolase family 17 protein               |

**Others**

|             |           |       |          |     |                                                                         |
|-------------|-----------|-------|----------|-----|-------------------------------------------------------------------------|
| 260659_s_at | At1g19470 | -7.10 | 0.011718 | -   | Galactose oxidase/kelch repeat superfamily protein                      |
| 266667_at   | At2g29770 | -5.15 | 0.001256 | -   | Galactose oxidase/kelch repeat superfamily protein                      |
| 255464_s_at | At4g02970 | -4.96 | 0.000028 | -   | AT7SL-1__7SL RNA1                                                       |
| 249041_at   | At5g44330 | -4.71 | 0.001768 | Yes | Tetratricopeptide repeat (TPR)-like superfamily protein                 |
| 266677_at   | At2g29820 | -3.25 | 0.007310 | -   | Galactose oxidase/kelch repeat superfamily protein                      |
| 254567_s_at | At4g19260 | -3.12 | 0.000414 | -   | Galactose oxidase/kelch repeat superfamily protein                      |
| 256975_at   | At3g21000 | -3.02 | 0.004770 | Yes | Gag-Pol-related retrotransposon family protein                          |
| 265213_at   | At1g05020 | -3.00 | 0.012585 | -   | ENTH/ANTH/VHS superfamily protein                                       |
| 264610_at   | At1g04645 | -2.98 | 0.015980 | -   | Plant self-incompatibility protein S1 family                            |
| 257693_at   | At3g12850 | -2.91 | 0.008471 | -   | COP9 signalosome complex-related / CSN complex-related                  |
| 266666_at   | At2g29780 | -2.88 | 0.014302 | -   | Galactose oxidase/kelch repeat superfamily protein                      |
| 265007_s_at | At1g61566 | -2.62 | 0.026665 | -   | RALFL9__ralf-like 9                                                     |
| 251568_at   | At3g58280 | -2.58 | 0.017035 | Yes | Arabidopsis phospholipase-like protein (PEARLI 4) with TRAF-like domain |
| 259904_at   | At1g74150 | -2.55 | 0.001618 | Yes | Galactose oxidase/kelch repeat superfamily protein                      |
| 251238_at   | At3g62430 | -2.41 | 0.003814 | Yes | Protein with RNI-like/FBD-like domains                                  |
| 266390_at   | At2g32310 | -2.28 | 0.005679 | -   | CCT motif family protein                                                |
| 266664_at   | At2g29800 | -2.03 | 0.018292 | -   | Galactose oxidase/kelch repeat superfamily protein                      |
| 251904_at   | At3g54130 | -1.87 | 0.001496 | -   | Josephin family protein                                                 |
| 255086_at   | At4g09300 | -1.85 | 0.030007 | -   | LisH and RanBPM domains containing protein                              |
| 248124_at   | At5g54730 | -1.76 | 0.027291 | -   | ATATG18F_ATG18F_G18F__homolog of yeast autophagy 18 (ATG18) F           |
| 259411_at   | At1g13410 | -1.65 | 0.003960 | -   | Tetratricopeptide repeat (TPR)-like superfamily protein                 |
| 264583_at   | At1g05170 | -1.60 | 0.002445 | -   | Galactosyltransferase family protein                                    |
| 259387_at   | At1g13370 | -1.55 | 0.026611 | -   | Histone superfamily protein                                             |
| 252873_at   | At4g40020 | -1.54 | 0.014398 | -   | Myosin heavy chain-related protein;                                     |
| 262579_at   | At1g15320 | -3.44 | 0.004175 | -   | Unknown protein                                                         |
| 256519_at   | At1g66110 | -2.97 | 0.002180 | -   | Family of unknown function (DUF577)                                     |
| 261251_at   | At1g05920 | -2.84 | 0.005208 | -   | Domain of unknown function (DUF313)                                     |
| 248702_at   | At5g48420 | -2.80 | 0.006283 | -   | Unknown protein                                                         |
| 248600_at   | At5g49390 | -2.64 | 0.004633 | Yes | Unknown protein                                                         |

|                        |             |           |       |          |     |                                                              |
|------------------------|-------------|-----------|-------|----------|-----|--------------------------------------------------------------|
|                        | 251339_at   | At3g60780 | -2.60 | 0.002411 | -   | Protein of unknown function (DUF1442)                        |
|                        | 254287_at   | At4g22960 | -2.34 | 0.002236 | -   | Protein of unknown function (DUF544)                         |
|                        | 245591_at   | At4g14530 | -2.32 | 0.005703 | -   | Unknown protein                                              |
|                        | 262836_at   | At1g14680 | -2.30 | 0.007553 | Yes | Unknown protein                                              |
|                        | 257589_at   | At1g55050 | -2.28 | 0.003476 | Yes | Unknown protein                                              |
|                        | 267039_at   | At2g34270 | -2.19 | 0.007458 | -   | Unknown protein                                              |
|                        | 254322_at   | At4g22600 | -2.07 | 0.019211 | -   | Unknown protein                                              |
|                        | 258424_at   | At3g16750 | -2.01 | 0.017727 | -   | Unknown protein                                              |
|                        | 249615_x_at | At5g37420 | -1.98 | 0.022555 | Yes | Family of unknown function (DUF577)                          |
|                        | 255339_at   | At4g04480 | -1.97 | 0.024326 | -   | Unknown protein                                              |
|                        | 257391_at   | At2g32050 | -1.87 | 0.033883 | -   | Family of unknown function (DUF572)                          |
|                        | 266092_at   | At2g37880 | -1.76 | 0.015567 | -   | Protein of unknown function, DUF617                          |
| <b>Unknown protein</b> | 254369_at   | At4g21720 | -1.76 | 0.017601 | -   | unknown protein                                              |
|                        | 261461_at   | At1g07860 | -1.72 | 0.017377 | Yes | Unknown protein                                              |
|                        | 251535_at   | At3g58540 | -1.67 | 0.003585 | Yes | Unknown protein                                              |
|                        | 252655_at   | At3g44760 | -1.66 | 0.021869 | -   | Unknown protein                                              |
|                        | 266504_at   | At2g47820 | -1.66 | 0.047543 | -   | Unknown protein                                              |
|                        | 265495_at   | At2g15695 | -1.66 | 0.014512 | -   | Protein of unknown function DUF829, transmembrane 53         |
|                        | 250372_at   | At5g11460 | -1.65 | 0.021539 | -   | Protein of unknown function (DUF581)                         |
|                        | 256957_at   | At3g13420 | -1.64 | 0.013262 | -   | Unknown protein                                              |
|                        | 263246_at   | At2g31460 | -1.63 | 0.007106 | -   | Domain of unknown function (DUF313)                          |
|                        | 266686_at   | At2g19700 | -1.62 | 0.030549 | -   | Unknown protein                                              |
|                        | 266479_at   | At2g31160 | -1.58 | 0.029481 | -   | LSH3__Protein of unknown function (DUF640)                   |
|                        | 259709_at   | At1g77655 | -1.58 | 0.000063 | -   | Unknown protein                                              |
|                        | 245261_at   | At4g14385 | -1.57 | 0.028296 | -   | Unknown protein                                              |
|                        | 251279_at   | At3g61800 | -1.56 | 0.008539 | -   | Unknown protein                                              |
|                        | 245497_at   | At4g16460 | -1.56 | 0.015478 | -   | Unknown protein                                              |
|                        | 249365_at   | At5g40600 | -1.55 | 0.029575 | -   | Unknown protein                                              |
|                        | 267022_at   | At2g34230 | -1.53 | 0.017201 | -   | Protein with domains of unknown function (DUF627 and DUF629) |
|                        | 254179_at   | At4g23910 | -1.53 | 0.045298 | -   | Unknown protein                                              |

---

**Supplemental Table 2. Up-regulated genes with expression level changed greater than 1.5-fold in the *cdm1* mutant.**

| Classification                            | Probe ID    | Locus     | Fold change | p-Value  | Anther specific | Gene description                                                       |
|-------------------------------------------|-------------|-----------|-------------|----------|-----------------|------------------------------------------------------------------------|
| <b>Carbohydrate metabolism</b>            | 253631_at   | At4g30440 | 1.97        | 0.026842 | –               | GAE1__UDP-D-glucuronate 4-epimerase 1                                  |
|                                           | 251455_at   | At3g60100 | 1.62        | 0.030938 | –               | CSY5__citrate synthase 5                                               |
| <b>Sucrose biosynthesis and transport</b> | 261072_at   | At1g07340 | 2.45        | 0.034534 | Yes             | ATSTP2__sugar transporter 2                                            |
|                                           | 264482_at   | At1g77210 | 1.99        | 0.026194 | –               | AtSTP14_STP14__sugar transporter 14                                    |
|                                           | 248211_at   | At5g54010 | 1.96        | 0.004364 | –               | UDP-Glycosyltransferase superfamily protein                            |
|                                           | 249150_at   | At5g43340 | 1.89        | 0.023038 | –               | PHT1;6_PHT6__phosphate transporter 1;6                                 |
|                                           | 251192_at   | At3g62720 | 1.63        | 0.015888 | –               | ATXT1_XT1_XXT1__xylosyltransferase 1                                   |
|                                           | 261877_at   | At1g50580 | 1.59        | 0.013922 | –               | UDP-Glycosyltransferase superfamily protein                            |
|                                           | 249057_at   | At5g44480 | 1.50        | 0.033763 | –               | DUR__NAD(P)-binding Rossmann-fold superfamily protein                  |
| <b>Pectin biosynthesis</b>                | 255524_at   | At4g02330 | 2.13        | 0.028705 | –               | ATPMEPCRB__Plant invertase/pectin methylesterase inhibitor superfamily |
|                                           | 249431_at   | At5g39910 | 1.79        | 0.040332 | –               | Pectin lyase-like superfamily protein                                  |
|                                           | 248968_at   | At5g45280 | 1.51        | 0.015029 | –               | Pectinacetyltransferase family protein                                 |
| <b>Other metabolism</b>                   | 262369_at   | At1g73010 | 3.04        | 0.008775 | –               | ATPS2_PS2__phosphate starvation-induced gene 2                         |
|                                           | 254926_at   | At4g11280 | 2.11        | 0.044948 | –               | ATACS6__1-aminocyclopropane-1-carboxylic acid (acc) synthase 6         |
|                                           | 257947_at   | At3g21720 | 1.88        | 0.022361 | –               | ICL__isocitrate lyase                                                  |
|                                           | 250100_at   | At5g16570 | 1.86        | 0.007305 | –               | GLN1;4__glutamine synthetase 1;4                                       |
|                                           | 250892_at   | At5g03760 | 1.81        | 0.049963 | –               | ATCSLA09__Nucleotide-diphospho-sugar transferases superfamily protein  |
|                                           | 266089_at   | At2g38010 | 1.75        | 0.035824 | –               | Neutral/alkaline non-lysosomal ceramidase                              |
|                                           | 263134_at   | At1g78570 | 1.73        | 0.012400 | –               | ATRHM1_RHM1_ROL1__rhamnose biosynthesis 1                              |
|                                           | 259905_s_at | At1g74140 | 1.65        | 0.043988 | Yes             | Rhomboid-related intramembrane serine protease family protein          |
|                                           | 258856_at   | At3g02040 | 1.60        | 0.000823 | –               | Glycerophosphodiester phosphodiesterase (GDPD) family protein          |
|                                           | 267541_at   | At2g32750 | 1.58        | 0.001481 | –               | Exostosin family protein                                               |
|                                           | 251827_at   | At3g55120 | 1.58        | 0.041359 | –               | A11_CFL_TT5__Chalcone-flavanone isomerase family protein               |
|                                           | 252967_at   | At4g38880 | 1.51        | 0.013296 | –               | ASE3_ATASE3__GLN phosphoribosyl pyrophosphate amidotransferase 3       |
|                                           | 252121_at   | At3g51160 | 1.50        | 0.048340 | –               | F24M12.200, GDP-D-MANNOSE-4,6-DEHYDRATASE 2                            |
|                                           | 257203_at   | At3g23730 | 2.43        | 0.016630 | –               | XTH16__xyloglucan endotransglucosylase/hydrolase 16                    |

|                                                      |             |           |          |          |                                                            |                                                                             |
|------------------------------------------------------|-------------|-----------|----------|----------|------------------------------------------------------------|-----------------------------------------------------------------------------|
| <b>Hydrolases</b>                                    | 259507_at   | At1g43910 | 1.90     | 0.005661 | -                                                          | P-loop containing nucleoside triphosphate hydrolases superfamily protein    |
|                                                      | 254158_at   | At4g24380 | 1.81     | 0.027513 | -                                                          | Serine hydrolase                                                            |
|                                                      | 259786_at   | At1g29660 | 1.68     | 0.040813 | -                                                          | GDSL-like Lipase/Acylhydrolase superfamily protein                          |
|                                                      | 261825_at   | At1g11545 | 1.66     | 0.029508 | -                                                          | XTH8_xyloglucan endotransglucosylase/hydrolase 8                            |
|                                                      | 250604_at   | At5g07830 | 1.58     | 0.003409 | -                                                          | AtGUS2_GUS2_glucuronidase 2                                                 |
|                                                      | 249657_at   | At5g37140 | 1.57     | 0.036243 | -                                                          | P-loop containing nucleoside triphosphate hydrolases superfamily protein    |
|                                                      | 249917_at   | At5g22460 | 1.54     | 0.041370 | -                                                          | alpha/beta-Hydrolases superfamily protein                                   |
|                                                      | 253608_at   | At4g30290 | 1.50     | 0.032940 | -                                                          | ATXTH19_XTH19_xyloglucan endotransglucosylase/hydrolase 19                  |
| <b>Cell wall related</b>                             | 254785_at   | At4g12730 | 1.92     | 0.006885 | -                                                          | FLA2_FASCICLIN-like arabinogalactan 2                                       |
|                                                      | 247189_at   | At5g65390 | 1.85     | 0.016356 | -                                                          | AGP7_arabinogalactan protein 7                                              |
|                                                      | 256964_at   | At3g13520 | 1.75     | 0.010608 | -                                                          | ATAGP12_arabinogalactan protein 12                                          |
|                                                      | 267260_at   | At2g23130 | 1.69     | 0.028621 | -                                                          | ATAGP17_arabinogalactan protein 17                                          |
|                                                      | 255080_at   | At4g09030 | 1.64     | 0.020114 | -                                                          | AGP10_ATAGP10_arabinogalactan protein 10                                    |
|                                                      | 263927_s_at | At2g21890 | 1.63     | 0.016363 | -                                                          | ATCAD3_CAD3_cinnamyl alcohol dehydrogenase homolog 3                        |
|                                                      | 259664_at   | At1g55330 | 1.61     | 0.011144 | -                                                          | AGP21_ATAGP21_arabinogalactan protein 21                                    |
|                                                      | 245674_at   | At1g56680 | 1.60     | 0.031618 | -                                                          | Chitinase family protein                                                    |
|                                                      | 264007_at   | At2g21140 | 1.59     | 0.004897 | -                                                          | ATPRP2_PRP2_proline-rich protein 2                                          |
|                                                      | 258415_at   | At3g17390 | 1.58     | 0.044462 | -                                                          | MAT4_MTO3_SAMS3_S-adenosylmethionine synthetase family protein              |
| <b>Protein phosphorylation and dephosphorylation</b> | 250358_at   | At5g11740 | 1.54     | 0.001707 | -                                                          | AGP15_ATAGP15_arabinogalactan protein 15                                    |
|                                                      | 254111_at   | At4g24890 | 5.64     | 0.008483 | -                                                          | ATPAP24_purple acid phosphatase 24                                          |
|                                                      | 261341_s_at | At1g52940 | 3.30     | 0.040813 | -                                                          | ATPAP5_purple acid phosphatase 5                                            |
|                                                      | 259635_at   | At1g56360 | 3.22     | 0.010690 | Yes                                                        | ATPAP6_purple acid phosphatase 6                                            |
|                                                      | 259399_at   | At1g17710 | 3.01     | 0.020803 | -                                                          | Pyridoxal phosphate phosphatase-related protein                             |
|                                                      | 253087_at   | At4g36350 | 2.99     | 0.031652 | Yes                                                        | ATPAP25_purple acid phosphatase 25                                          |
|                                                      | 251491_at   | At3g59480 | 2.20     | 0.037607 | -                                                          | pfkB-like carbohydrate kinase family protein                                |
|                                                      | 265038_at   | At1g03920 | 1.84     | 0.022743 | -                                                          | Protein kinase family protein                                               |
|                                                      | 265405_at   | At2g16750 | 1.62     | 0.014916 | -                                                          | Protein kinase protein with adenine nucleotide alpha hydrolases-like domain |
|                                                      | 250360_at   | At5g11360 | 1.55     | 0.035183 | -                                                          | Interleukin-1 receptor-associated kinase 4 protein                          |
| 248179_at                                            | At5g54380   | 1.54      | 0.047856 | -        | THE1_protein kinase family protein                         |                                                                             |
| 265216_at                                            | At1g05100   | 1.50      | 0.006043 | -        | MAPKKK18_mitogen-activated protein kinase kinase kinase 18 |                                                                             |

|                              |           |           |      |          |   |                                                                                              |
|------------------------------|-----------|-----------|------|----------|---|----------------------------------------------------------------------------------------------|
|                              | 255345_at | At4g04460 | 1.77 | 0.016701 | - | Saposin-like aspartyl protease family protein                                                |
|                              | 249000_at | At5g44980 | 1.75 | 0.004132 | - | F-box/RNI-like/FBD-like domains-containing protein                                           |
|                              | 262087_at | At1g56030 | 1.74 | 0.004157 | - | RING/U-box superfamily protein                                                               |
|                              | 267056_at | At2g32470 | 1.71 | 0.022508 | - | F-box associated ubiquitination effector family protein                                      |
|                              | 256108_at | At1g16940 | 1.68 | 0.002580 | - | F-box/RNI-like/FBD-like domains-containing protein                                           |
| <b>Proteolysis</b>           | 251239_at | At3g62440 | 1.67 | 0.017858 | - | F-box/RNI-like superfamily protein                                                           |
|                              | 253651_at | At4g30030 | 1.64 | 0.008477 | - | Eukaryotic aspartyl protease family protein                                                  |
|                              | 258431_at | At3g16580 | 1.61 | 0.016547 | - | F-box and associated interaction domains-containing protein                                  |
|                              | 253579_at | At4g30610 | 1.58 | 0.043677 | - | BRS1_SCPL24_alpha/beta-Hydrolases superfamily protein                                        |
|                              | 256767_at | At3g13680 | 1.56 | 0.019513 | - | F-box and associated interaction domains-containing protein                                  |
|                              | 267264_at | At2g22970 | 1.53 | 0.017314 | - | SCPL11_serine carboxypeptidase-like 11                                                       |
|                              | 252144_at | At3g51190 | 2.31 | 0.007769 | - | Ribosomal protein L2 family                                                                  |
|                              | 251572_at | At3g58390 | 2.29 | 0.009385 | - | Eukaryotic release factor 1 (eRF1) family protein                                            |
| <b>Protein Biosynthesis</b>  | 247739_at | At5g59240 | 1.96 | 0.002371 | - | Ribosomal protein S8e family protein                                                         |
|                              | 266972_at | At2g39590 | 1.79 | 0.031850 | - | Ribosomal protein S8 family protein                                                          |
|                              | 262132_at | At1g02830 | 1.77 | 0.033130 | - | Ribosomal protein L13e family protein                                                        |
|                              | 252283_at | At3g48960 | 1.71 | 0.009667 | - | Ribosomal protein L13e family protein                                                        |
|                              | 247224_at | At5g65080 | 3.18 | 0.009640 | - | AGL68_MAF5_K-box region and MADS-box transcription factor family protein                     |
|                              | 247666_at | At5g60140 | 2.08 | 0.012270 | - | AP2/B3-like transcriptional factor family protein                                            |
|                              | 255014_at | At4g09960 | 2.05 | 0.028994 | - | AGL11_STK_K-box region and MADS-box transcription factor family protein                      |
|                              | 258385_at | At3g15510 | 2.03 | 0.012982 | - | ANAC056_ATNAC2_NAC2_NARS1_NAC domain containing protein 2                                    |
| <b>Transcription factors</b> | 266597_at | At2g46130 | 1.97 | 0.009462 | - | ATWRKY43_WRKY43_WRKY DNA-binding protein 43                                                  |
|                              | 264882_at | At1g61110 | 1.84 | 0.033509 | - | NAC025_NAC domain containing protein 25                                                      |
|                              | 252193_at | At3g50060 | 1.83 | 0.044658 | - | MYB77_myb domain protein 77                                                                  |
|                              | 263463_at | At2g31770 | 1.65 | 0.042392 | - | ATARI9_RING/U-box superfamily protein                                                        |
|                              | 251861_at | At3g54810 | 1.58 | 0.047847 | - | BME3_BME3-L1_GAI18_Piant-specific GAI1A-type zinc finger transcription factor family protein |
|                              | 258960_at | At3g10590 | 1.54 | 0.017428 | - | Duplicated homeodomain-like superfamily protein                                              |
|                              | 260427_at | At1g72430 | 2.34 | 0.002835 | - | SAUR-like auxin-responsive protein family                                                    |
| <b>Hormone response</b>      | 247657_at | At5g59845 | 2.25 | 0.008782 | - | Gibberellin-regulated family protein                                                         |
|                              | 258399_at | At3g15540 | 1.69 | 0.046016 | - | IAA19_MSG2_indole-3-acetic acid inducible 19                                                 |

|                                        |             |           |          |          |                                                          |                                                                                           |
|----------------------------------------|-------------|-----------|----------|----------|----------------------------------------------------------|-------------------------------------------------------------------------------------------|
| <b>Signal transduction(others)</b>     | 249583_at   | At5g37770 | 2.48     | 0.003746 | -                                                        | CML24_TCH2_EF hand calcium-binding protein family                                         |
|                                        | 263903_at   | At2g36180 | 2.44     | 0.000810 | -                                                        | EF hand calcium-binding protein family                                                    |
|                                        | 266447_at   | At2g43290 | 2.20     | 0.001468 | -                                                        | MSS3_Calcium-binding EF-hand family protein                                               |
|                                        | 253571_at   | At4g31000 | 1.78     | 0.007180 | -                                                        | Calmodulin-binding protein                                                                |
|                                        | 245334_at   | At4g15800 | 1.52     | 0.020917 | -                                                        | RALFL33_ralf-like 33                                                                      |
| <b>Fatty acid - lipid biosynthesis</b> | 248638_at   | At5g49070 | 3.26     | 0.040551 | Yes                                                      | KCS21_3-ketoacyl-CoA synthase 21                                                          |
|                                        | 250610_at   | At5g07550 | 2.94     | 0.025952 | -                                                        | ATGRP19_GRP19_glycine-rich protein 19                                                     |
|                                        | 263195_at   | At1g36150 | 2.41     | 0.046607 | -                                                        | Bifunctional inhibitor/lipid-transfer protein/seed storage 2S albumin superfamily protein |
|                                        | 245322_at   | At4g14815 | 1.91     | 0.002596 | -                                                        | Bifunctional inhibitor/lipid-transfer protein/seed storage 2S albumin superfamily protein |
|                                        | 256381_at   | At1g66850 | 1.80     | 0.016599 | Yes                                                      | Bifunctional inhibitor/lipid-transfer protein/seed storage 2S albumin superfamily protein |
|                                        | 255732_at   | At1g25450 | 1.65     | 0.004383 | -                                                        | CER60_KCS5_3-ketoacyl-CoA synthase 5                                                      |
| <b>Stress response</b>                 | 264648_at   | At1g09080 | 5.82     | 0.001384 | -                                                        | BIP3_Heat shock protein 70 (Hsp 70) family protein                                        |
|                                        | 246418_at   | At5g16960 | 2.43     | 0.044079 | -                                                        | Zinc-binding dehydrogenase family protein                                                 |
|                                        | 262113_at   | At1g02820 | 2.20     | 0.029844 | -                                                        | Late embryogenesis abundant 3 (LEA3) family protein                                       |
|                                        | 253839_at   | At4g27890 | 2.19     | 0.003878 | -                                                        | HSP20-like chaperones superfamily protein                                                 |
|                                        | 248434_at   | At5g51440 | 1.80     | 0.004205 | -                                                        | HSP20-like chaperones superfamily protein                                                 |
|                                        | 262911_s_at | At1g59860 | 1.76     | 0.039016 | -                                                        | HSP20-like chaperones superfamily protein                                                 |
|                                        | 248719_at   | At5g47910 | 1.71     | 0.001589 | -                                                        | ATRBOHD_RBOHD_respiratory burst oxidase homologue D                                       |
|                                        | 267069_at   | At2g41010 | 1.69     | 0.017760 | -                                                        | ATCAMP25_CAMBP25_calmodulin (CAM)-binding protein of 25 kDa                               |
|                                        | 260686_at   | At1g17620 | 1.69     | 0.000358 | -                                                        | Late embryogenesis abundant (LEA) hydroxyproline-rich glycoprotein family                 |
|                                        | 264436_at   | At1g10370 | 1.67     | 0.034774 | -                                                        | ATGSTU17_ERD9_GST30_GST30B_Glutathione S-transferase family protein                       |
|                                        | 254563_at   | At4g19120 | 1.51     | 0.041998 | -                                                        | ERD3_early-responsive to dehydration 3                                                    |
| 258751_at                              | At3g05890   | 1.50      | 0.038262 | -        | RCI2B_Low temperature and salt responsive protein family |                                                                                           |
| <b>Electron transport</b>              | 260228_at   | At1g74540 | 2.56     | 0.041783 | Yes                                                      | CYP98A8_cytochrome P450, family 98, subfamily A, polypeptide 8                            |
|                                        | 265422_at   | At2g20800 | 2.37     | 0.016256 | -                                                        | NDB4_NAD(P)H dehydrogenase B4                                                             |
|                                        | 259852_at   | At1g72280 | 2.05     | 0.035133 | -                                                        | AERO1_ERO1_endoplasmic reticulum oxidoreductins 1                                         |
|                                        | 257633_at   | At3g26125 | 2.01     | 0.045400 | -                                                        | CYP86C2_cytochrome P450, family 86, subfamily C, polypeptide 2                            |
|                                        | 262933_at   | At1g65840 | 1.55     | 0.022588 | -                                                        | ATPAO4_PAO4_polyamine oxidase 4                                                           |
|                                        | 262764_at   | At1g13140 | 1.54     | 0.045919 | Yes                                                      | CYP86C3_cytochrome P450, family 86, subfamily C, polypeptide 3                            |



|                               |             |           |      |          |   |                                                                          |
|-------------------------------|-------------|-----------|------|----------|---|--------------------------------------------------------------------------|
|                               | 265188_at   | At1g23800 | 1.51 | 0.010417 | - | ALDH2B_ALDH2B7__aldehyde dehydrogenase 2B7                               |
|                               | 253915_at   | At4g27280 | 3.61 | 0.007302 | - | Calcium-binding EF-hand family protein                                   |
|                               | 254884_at   | At4g11730 | 2.61 | 0.024809 | - | Cation transporter/ E1-E2 ATPase family protein                          |
|                               | 259327_at   | At3g16460 | 2.18 | 0.003746 | - | Mannose-binding lectin superfamily protein                               |
| <b>Ion transport</b>          | 246302_at   | At3g51860 | 1.99 | 0.035034 | - | ATCAX3_ATHCX1_CAX1-LIKE_CAX3__cation exchanger 3                         |
|                               | 265460_at   | At2g46600 | 1.96 | 0.002629 | - | Calcium-binding EF-hand family protein                                   |
|                               | 254855_s_at | At4g12140 | 1.70 | 0.022233 | - | RING/U-box superfamily protein                                           |
|                               | 263319_at   | At2g47160 | 1.55 | 0.036325 | - | BOR1__HCO3- transporter family                                           |
|                               | 251975_at   | At3g53230 | 1.54 | 0.037119 | - | ATPase, AAA-type, CDC48 protein                                          |
|                               | 265002_at   | At1g24400 | 2.64 | 0.011178 | - | AATL2_ATLHT2_LHT2__lysine histidine transporter 2                        |
|                               | 248274_at   | At5g53510 | 2.11 | 0.021368 | - | ATOPT9_oligopeptide transporter 9                                        |
| <b>Oligopeptide transport</b> | 262912_at   | At1g59740 | 1.84 | 0.016025 | - | Major facilitator superfamily protein                                    |
|                               | 245740_at   | At1g44100 | 1.72 | 0.004759 | - | AAP5__amino acid permease 5                                              |
|                               | 257671_at   | At3g20450 | 1.68 | 0.036703 | - | B-cell receptor-associated protein 31-like                               |
|                               | 258760_at   | At3g10780 | 1.68 | 0.027512 | - | emp24/gp25L/p24 family/GOLD family protein                               |
|                               | 265064_at   | At1g61630 | 2.04 | 0.046975 | - | ATENT7_equilibrative nucleoside transporter 7                            |
| <b>Other transporters</b>     | 253193_at   | At4g35380 | 1.93 | 0.014487 | - | SEC7-like guanine nucleotide exchange family protein                     |
|                               | 254120_at   | At4g24570 | 1.85 | 0.029046 | - | DIC2__dicarboxylate carrier 2                                            |
|                               | 261926_at   | At1g22530 | 1.57 | 0.011419 | - | PATL2__PATELLIN 2                                                        |
|                               | 255575_at   | At4g01430 | 2.12 | 0.028343 | - | Nodulin MtN21 /EamA-like transporter family protein                      |
| <b>Nodulin proteins</b>       | 261335_at   | At1g44800 | 1.99 | 0.036179 | - | Nodulin MtN21 /EamA-like transporter family protein                      |
|                               | 255576_at   | At4g01440 | 1.61 | 0.027334 | - | nodulin MtN21 /EamA-like transporter family protein                      |
|                               | 250110_at   | At5g15350 | 1.60 | 0.010991 | - | AtENODL17_ENODL17__early nodulin-like protein 17                         |
| <b>Pollen development</b>     | 267440_at   | At2g19070 | 3.32 | 0.046943 | - | SHT__spermidine hydroxycinnamoyl transferase                             |
|                               | 252364_at   | At3g48450 | 2.96 | 0.042199 | - | RPM1-interacting protein 4 (RIN4) family protein                         |
|                               | 251498_at   | At3g59070 | 2.87 | 0.002265 | - | Cytochrome b561/ferric reductase transmembrane with DOMON related domain |
|                               | 265881_at   | At2g42480 | 2.64 | 0.019325 | - | TRAF-like family protein                                                 |

**Others**

|             |           |      |          |     |                                                                   |
|-------------|-----------|------|----------|-----|-------------------------------------------------------------------|
| 247961_at   | At5g56570 | 2.56 | 0.010292 | -   | Leucine-rich repeat (LRR) family protein                          |
| 252944_at   | At4g39320 | 2.19 | 0.044770 | -   | Microtubule-associated protein-related                            |
| 252160_at   | At3g50570 | 2.07 | 0.017824 | -   | hydroxyproline-rich glycoprotein family protein                   |
| 250677_at   | At5g06520 | 2.03 | 0.013749 | -   | SWAP (Suppressor-of-White-APricot)/surp domain-containing protein |
| 261586_at   | At1g01640 | 2.02 | 0.009986 | -   | BTB/POZ domain-containing protein                                 |
| 254212_at   | At4g23580 | 1.95 | 0.008177 | -   | Galactose oxidase/kelch repeat superfamily protein                |
| 251569_at   | At3g58290 | 1.95 | 0.025007 | -   | TRAF-like superfamily protein                                     |
| 257442_at   | At2g28680 | 1.89 | 0.046103 | -   | RmlC-like cupins superfamily protein                              |
| 252615_at   | At3g45230 | 1.80 | 0.019653 | -   | hydroxyproline-rich glycoprotein family protein                   |
| 254570_s_at | At4g19330 | 1.71 | 0.002017 | -   | Galactose oxidase/kelch repeat superfamily protein                |
| 245559_at   | At4g15460 | 1.68 | 0.007546 | -   | Glycine-rich protein                                              |
| 257900_at   | At3g28420 | 1.68 | 0.013643 | -   | Putative membrane lipoprotein                                     |
| 266549_at   | At2g35150 | 1.67 | 0.019044 | -   | EXL1__EXORDIUM like 1                                             |
| 250535_at   | At5g08480 | 1.61 | 0.022658 | -   | VQ motif-containing protein                                       |
| 245058_at   | At2g39790 | 1.58 | 0.017796 | -   | Mitochondrial glycoprotein family protein                         |
| 253169_at   | At4g35120 | 1.58 | 0.009954 | -   | Galactose oxidase/kelch repeat superfamily protein                |
| 256275_at   | At3g12110 | 1.58 | 0.002096 | -   | ACT11__actin-11                                                   |
| 264966_at   | At1g60570 | 1.56 | 0.029473 | -   | Galactose oxidase/kelch repeat superfamily protein                |
| 265251_at   | At2g01960 | 1.51 | 0.036724 | -   | TET14__tetraspanin14                                              |
| 248241_at   | At5g53960 | 1.99 | 0.035419 | -   | ATP binding;DNA binding;DNA topoisomerase (ATP-hydrolyzing)s      |
| 247293_at   | At5g64510 | 2.46 | 0.025705 | -   | Unknown protein;                                                  |
| 253643_at   | At4g29780 | 2.21 | 0.040071 | -   | Unknown protein                                                   |
| 248716_at   | At5g48210 | 2.16 | 0.024190 | Yes | Protein of unknown function (DUF1278)                             |
| 256867_at   | At3g26390 | 2.14 | 0.023971 | -   | Unknown protein                                                   |
| 256569_at   | At3g19550 | 2.10 | 0.017261 | -   | Unknown protein                                                   |
| 252161_at   | At3g50580 | 2.06 | 0.031814 | -   | Unknown protein                                                   |
| 257578_x_at | At3g30160 | 2.05 | 0.003392 | -   | Unknown protein                                                   |
| 253165_at   | At4g35320 | 2.02 | 0.010779 | -   | Unknown protein                                                   |
| 265438_at   | At2g20970 | 2.00 | 0.016996 | -   | Unknown protein                                                   |
| 254793_at   | At4g12930 | 1.93 | 0.040199 | -   | Unknown protein                                                   |
| 264359_at   | At1g03320 | 1.91 | 0.030834 | -   | Unknown protein                                                   |
| 258397_at   | At3g15357 | 1.88 | 0.008059 | -   | Unknown protein                                                   |

|                        |             |           |      |          |     |                                             |
|------------------------|-------------|-----------|------|----------|-----|---------------------------------------------|
| <b>Unknown protein</b> | 262910_at   | At1g59710 | 1.70 | 0.015515 | -   | Protein of unknown function (DUF569)        |
|                        | 260883_at   | At1g29270 | 1.69 | 0.014749 | -   | Unknown protein                             |
|                        | 265186_at   | At1g23560 | 1.65 | 0.031498 | -   | Domain of unknown function (DUF220)         |
|                        | 266550_s_at | At2g35070 | 1.65 | 0.006349 | -   | Unknown protein                             |
|                        | 254823_at   | At4g12580 | 1.62 | 0.029172 | -   | Unknown protein                             |
|                        | 259433_at   | At1g01570 | 1.57 | 0.007240 | -   | Protein of unknown function (DUF604)        |
|                        | 260761_at   | At1g49150 | 1.57 | 0.001646 | -   | Unknown protein                             |
|                        | 249211_at   | At5g42680 | 1.56 | 0.001018 | -   | Protein of unknown function, DUF617         |
|                        | 265823_at   | At2g35760 | 1.56 | 0.026118 | -   | Uncharacterised protein family (UPF0497)    |
|                        | 266635_at   | At2g35470 | 1.55 | 0.010343 | -   | Unknown protein                             |
|                        | 264902_at   | At1g23060 | 1.53 | 0.038465 | -   | Unknown protein                             |
|                        | 257555_at   | At3g24780 | 1.53 | 0.027452 | -   | Uncharacterised conserved protein UCP015417 |
|                        | 264909_at   | At2g17300 | 1.53 | 0.043793 | -   | Unknown protein                             |
|                        | 253525_at   | At4g31330 | 1.51 | 0.034161 | -   | Protein of unknown function, DUF599         |
|                        | 267633_at   | At2g42180 | 1.51 | 0.010992 | Yes | Unknown protein                             |
|                        | 248904_at   | At5g46295 | 1.50 | 0.036653 | -   | Unknown protein                             |

---

**Supplemental Table 3. The genes show differential expression levels between *cdm1* and the wild type, involved in callose dissolution and anther and pollen development.**

| Classification                | Probe ID  | Locus     | Fold change | p-Value  | Anther specific | Gene name/description                                                          |
|-------------------------------|-----------|-----------|-------------|----------|-----------------|--------------------------------------------------------------------------------|
| Putative beta-1, 3-glucanase  | 257165_at | At3g24330 | -2.08       | 0.034071 | Yes             | O-Glycosyl hydrolases family 17 protein                                        |
|                               | 251754_at | At3g55780 | -1.77       | 0.012575 | Yes             | Glycosyl hydrolase superfamily protein                                         |
|                               | 251280_at | At3g61810 | -1.60       | 0.001122 | –               | Glycosyl hydrolase family 17 protein                                           |
| Anther and pollen development | 248390_at | At5g52000 | -3.35       | 0.033601 | –               | IMPA-8__importin alpha isoform 8 (Borg et al., 2011)                           |
|                               | 257451_at | At1g05690 | -2.95       | 0.002348 | –               | BT3__BTB and TAZ domain protein 3 (Robert et al., 2009)                        |
|                               | 262580_at | At1g15330 | -2.85       | 0.025430 | –               | AtPV42a__Cystathionine beta-synthase (CBS) protein (Fang et al., 2011)         |
|                               | 250223_at | At5g14070 | -1.54       | 0.021751 | –               | glutaredoxin ROXY2 (Xing and Zachgo, 2008)                                     |
|                               | 262178_at | At1g77860 | -1.51       | 0.028109 | –               | KOM__Intramembrane serine protease family protein (Kanaoka et al., 2002, 2003) |
|                               | 267440_at | At2g19070 | 3.32        | 0.046943 | –               | SHT__spermidine hydroxycinnamoyl transferase (Dobritsa et al., 2011)           |

## References

- Borg M, Brownfield L, Khatab H, Sidorova A, Lingaya M, Twell D** (2011) The R2R3 MYB transcription factor DUO1 activates a male germline-specific regulon essential for sperm cell differentiation in *Arabidopsis*. *Plant Cell* **23**: 534-549
- Dobritsa AA, Geanconteri A, Shrestha J, Carlson A, Kooyers N, Coerper D, Urbanczyk-Wochniak E, Bench BJ, Sumner LW, Swanson R, Preuss D** (2011) A large-scale genetic screen in *Arabidopsis* to identify genes involved in pollen exine production. *Plant Physiol.* **157**: 947-970
- Fang L, Hou X, Lee LY, Liu L, Yan X, Yu H** (2011) *AtPV42a* and *AtPV42b* redundantly regulate reproductive development in *Arabidopsis thaliana*. *PLoS ONE* **6**: e19033
- Kanaoka M, Shimizu KK, Okada K** (2002) Exine patterning is disrupted by reduced callose accumulation in *kompeito*. 13th International Conference on Arabidopsis Research
- Kanaoka M, Shimizu KK, Okada K** (2003) KOMPEITO is important for callose accumulation and exine formation in *Arabidopsis* microgametogenesis and is localized in golgi apparatus. 14th International Conference on Arabidopsis Research
- Robert HS, Quint A, Brand D, Vivian-Smith A, Offringa R** (2009) BTB and TAZ domain scaffold proteins perform a crucial function in *Arabidopsis* development. *Plant J.* **58**: 109-121
- Xing S, Zachgo S** (2008) *ROXY1* and *ROXY2*, two *Arabidopsis* glutaredoxin genes, are required for anther development. *Plant J.* **53**: 790-801

**Supplemental Table 4. Primer sequences used in this study.**

| <b>Stock Number</b> | <b>Nucleotide sequence</b>  | <b>Gene</b>                                | <b>Purpose</b> |
|---------------------|-----------------------------|--------------------------------------------|----------------|
| oMC7506             | 5'-GTTGTGTTACACGCGTCTCC-3'  | <i>CDM1</i> Forward                        | qRT-PCR        |
| oMC7507             | 5'-AAATCGGTTCTGGATCGAAG-3'  | <i>CDM1</i> Reverse                        |                |
| oMC7508             | 5'-AAGCCATTTTCAGAGCCAAGT-3' | At2g13680 ( <i>AtGSL2/CalS5</i> ) Forward  | qRT-PCR        |
| oMC7509             | 5'-CACTTCGCTTCTGATTTCCA-3'  | At2g13680 ( <i>AtGSL2/CalS5</i> ) Reverse  |                |
| oMC7510             | 5'-TGCCACATCTCTTATCCCAA-3'  | AT5G13390 ( <i>NEF1</i> ) Forward          | qRT-PCR        |
| oMC7511             | 5'-TGTTACAACGATCAGGGCAT-3'  | AT5G13390 ( <i>NEF1</i> ) Reverse          |                |
| oMC7512             | 5'-AAAGAAGGGTCTCACCATCG-3'  | AT3G09090 ( <i>DEX1</i> ) Forward          | qRT-PCR        |
| oMC7513             | 5'-ACCGTCAACATTATCAGCCA-3'  | AT3G09090 ( <i>DEX1</i> ) Reverse          |                |
| oMC7527             | 5'-GAAGAATCTTGGGTGGGAGA-3'  | At5g24860 ( <i>FLP1</i> ) Forward          | qRT-PCR        |
| oMC7528             | 5'-GGAGAAGTCACGAGGGAGAG-3'  | At5g24860 ( <i>FLP1</i> ) Reverse          |                |
| oMC7529             | 5'-CTGCTGCT AATACAACCT-3'   | At3g11980 ( <i>MS2</i> ) Forward           | qRT-PCR        |
| oMC7530             | 5'-TGCTATAACAATCTCCATA-3'   | At3g11980 ( <i>MS2</i> ) Reverse           |                |
| oMC7531             | 5'-TACCTAAACCGACGAACA-3'    | At4g14080 ( <i>A6</i> ) Forward            | qRT-PCR        |
| oMC7532             | 5'-ATGCCAATAAATG GAGAC-3'   | At4g14080 ( <i>A6</i> ) Reverse            |                |
| oMC7533             | 5'-GAAGAAGAAGTTGTCAGGAA-3'  | At5g56110 ( <i>AtMYB103</i> ) Forward      | qRT-PCR        |
| oMC7534             | 5'-GTGAGCAAGTGAAGCATCT-3'   | At5g56110 ( <i>AtMYB103</i> ) Reverse      |                |
| oMC7537             | 5'-TCAGCCTTTCAACAAGATCG-3'  | At4g04970 ( <i>AtGSL1/CalS11</i> ) Forward | qRT-PCR        |
| oMC7538             | 5'-TCGAGTAGCTCAACCTCCCT-3'  | At4g04970 ( <i>AtGSL1/CalS11</i> ) Reverse |                |
| oMC7541             | 5'-CCACCAGGAGTACATTCAGG-3'  | At4g03550 ( <i>AtGSL5/CalS12</i> ) Forward | qRT-PCR        |
| oMC7542             | 5'-TGAAGAAATCAAGCCTGTGC-3'  | At4g03550 ( <i>AtGSL5/CalS12</i> ) Reverse |                |
| oMC7589             | 5'-ACCAGTCTACTTCGGAGA-3'    | At4g18340 Forward                          | qRT-PCR        |
| oMC7590             | 5'-GCTCCTCTTTGCCTTAGTGG-3'  | At4g18340 Reverse                          |                |
| oMC7591             | 5'-AACGGTGGAGTCAACATCAA-3'  | At3g24330 Forward                          | qRT-PCR        |
| oMC7592             | 5'-TTCCTCTAGTGCTCGTTGGA-3'  | At3g24330 Reverse                          |                |
| oMC7593             | 5'-ACCACCGGAGTAAGATACCG-3'  | At3g55780 Forward                          | qRT-PCR        |
| oMC7594             | 5'-GAGCTAGGCCAACCAGTCTC-3'  | At3g55780 Reverse                          |                |
| oMC7635             | 5'-ATTCAACCACAGCAAGTCCA-3'  | At1g26450 Forward                          | qRT-PCR        |
| oMC7636             | 5'-CACTCGTGCTGCTAGATGGT-3'  | At1g26450 Reverse                          |                |
| oMC7597             | 5'-TGTAGGTCCACAAATCGGAA-3'  | At3g61810 Forward                          | qRT-PCR        |
| oMC7598             | 5'-CGATGGTATTGCTTCTGGTG-3'  | At3g61810 Reverse                          |                |
| oMC7599             | 5'-CTTCAACCCTAACCCCTGGAA-3' | At1g30080 Forward                          | qRT-PCR        |
| oMC7600             | 5'-TCGATGTCTTTGAAGCCAAG-3'  | At1g30080 Reverse                          |                |
| oMC7609             | 5'-CATGGAGCAACAGTTTGGAC-3'  | At1g77860 Forward                          | qRT-PCR        |
| oMC7610             | 5'-GCAGCACCAGAAGAGATTGA-3'  | At1g77860 Reverse                          |                |
| oMC7611             | 5'-ACCATCCATGTTGTTGTTGG-3'  | At4g24890 Forward                          | qRT-PCR        |
| oMC7612             | 5'-GAGTGATCGGAAGCAGTCAA-3'  | At4g24890 Reverse                          |                |
| oMC7647             | 5'-TTTGGCTTGAGCAAGAGCTA-3'  | At1g56360 Forward                          | qRT-PCR        |
| oMC7648             | 5'-TAACGAGCCACGACTCAAAC-3'  | At1g56360 Reverse                          |                |
| oMC7651             | 5'-CATCACGCCACAATTAAGG-3'   | At4g36350 Forward                          | qRT-PCR        |
| oMC7652             | 5'-CACCAATAATGCCGAAAGTG-3'  | At4g36350 Reverse                          |                |
| oMC7617             | 5'-TGTTCCGAAATTGTTGGTGT-3'  | At1g74540 Forward                          | qRT-PCR        |
| oMC7618             | 5'-ATCTCTGCCATAGCCCATTG-3'  | At1g74540 Reverse                          |                |
| oMC7659             | 5'-GTGAACGCAATCGCTACAGT-3'  | At1g07340 Forward                          | qRT-PCR        |
| oMC7660             | 5'-TGTAGCGGTCATCTGGAGAG-3'  | At1g07340 Reverse                          |                |
| oMC7703             | 5'-GGGCTATGACTGCTGGAAAT-3'  | At5g52000 ( <i>IMPA-8</i> ) Forward        | qRT-PCR        |
| oMC7704             | 5'-AGTCCCTGCAGTGATGTTG-3'   | At5g52000 ( <i>IMPA-8</i> ) Reverse        |                |
| oMC7705             | 5'-GTCTCACTTCTGCCCCATT-3'   | At1g05690 ( <i>BT3</i> ) Forward           | qRT-PCR        |
| oMC7706             | 5'-CTGCTTCAACAAGGAACTCCA-3' | At1g05690 ( <i>BT3</i> ) Reverse           |                |
| oMC7707             | 5'-TTGATTGAGTCTGCCTCTGC-3'  | At1g15330 ( <i>AtPV42a</i> ) Forward       | qRT-PCR        |
| oMC7708             | 5'-TGGCGTAAACGGAATCATT-3'   | At1g15330 ( <i>AtPV42a</i> ) Reverse       |                |
| oMC7709             | 5'-GTGTTTCATCGGAGGGAAGAT-3' | At5g14070 ( <i>ROXY2</i> ) Forward         | qRT-PCR        |
| oMC7710             | 5'-GCACTCATCAGAGCCAAAGA-3'  | At5g14070 ( <i>ROXY2</i> ) Reverse         |                |
| oMC7711             | 5'-CATGGAGCAACAGTTTGGAC-3'  | At1g77860 ( <i>KOM</i> ) Forward           | qRT-PCR        |
| oMC7712             | 5'-GCAGCACCAGAAGAGATTGA-3'  | At1g77860 ( <i>KOM</i> ) Reverse           |                |
| oMC7713             | 5'-GAAGTAAAGCCAACGGAAGC-3'  | At2g19070 ( <i>SHT</i> ) Forward           | qRT-PCR        |
| oMC7714             | 5'-ATTCTAGAGCCGTTGGTTG-3'   | At2g19070 ( <i>SHT</i> ) Reverse           |                |
| oMC7715             | 5'-AATTGGTAGCCAGTGAAGG-3'   | At2g42890 ( <i>MEI2-like2</i> ) Forward    | qRT-PCR        |
| oMC7716             | 5'-GAGCAGGAAGAATTGAAGCC-3'  | At2g42890 ( <i>MEI2-like2</i> ) Reverse    |                |

|         |                                                            |                                                                                                              |                                                                                         |
|---------|------------------------------------------------------------|--------------------------------------------------------------------------------------------------------------|-----------------------------------------------------------------------------------------|
| oMC1533 | 5'-GGTAACATTGTGCTCAGTGGTGG-3'                              | Actin Forward                                                                                                |                                                                                         |
| oMC1534 | 5'-AACGACCTTAATCTTCATGCTGC-3'                              | Actin Reverse                                                                                                | qRT-PCR                                                                                 |
| oMC2216 | 5'-ACCGGCAAGACCATCACTCT-3'                                 | Ubiquitin Forward                                                                                            |                                                                                         |
| oMC2217 | 5'-AGGCCTCAACTGGTTGCTGT-3'                                 | Ubiquitin Reverse                                                                                            | RT-PCR                                                                                  |
| oMC7395 | TCATGTGATCAGCTTGAGGG                                       | CDM1 Reverse                                                                                                 | RT-PCR                                                                                  |
| oMC7489 | 5'-TAAATCTGGCATGCAAATGTG-3'                                | SALK_065040 LP                                                                                               |                                                                                         |
| oMC7490 | 5'-TGAATTCACCACATAACCGATG-3'                               | SALK_065040 RP                                                                                               | T-DNA Identification                                                                    |
| oMC7545 | 5'-ATGAAAACAAAATCGCGCC-3'                                  | <i>CDM1</i> RNA <i>In situ</i> Forward                                                                       |                                                                                         |
| oMC7546 | 5'-TCTCTTCCTCCTGATCTTCT-3'                                 | <i>CDM1</i> RNA <i>In situ</i> Reverse                                                                       | <i>In situ</i> probe                                                                    |
| oMC7495 | 5'-<br>cctctagagtcgacctgcagTATGGTCCCAAGAAAA<br>TGGCAGAG-3' | <i>CDM1</i> promoter forward, with 15bp<br>overlapping with pCAMBIA1301 Pst I<br>digested end                |                                                                                         |
| oMC7494 | 5'-TTTCCCGGTGACAATTCTGTTACACA-3'                           | <i>CDM1</i> promoter reverse                                                                                 |                                                                                         |
| oMC7496 | 5'-<br>attgtcaccgggaaaaATGAAAACAAAATCGCG<br>CCGTTT-3'      | <i>CDM1</i> CDS forward, with 15bp overlapping<br>with its promoter region                                   | The GR inducible<br>construction for<br>functional<br>complementation of<br>cdm1 mutant |
| oMC7497 | 5'-<br>agtggcttgctgaatTGTGATCAGCTTGAGGGATG<br>ACT-3'       | <i>CDM1</i> CDS reverse, with 15bp overlapping<br>with GR domain                                             |                                                                                         |
| oMC7453 | 5'-ATTCAGCAAGCCACTGCAGG-3'                                 | GR Sense primer                                                                                              |                                                                                         |
| oMC7456 | 5'-<br>ACCTGTAATTCACACGTGTTACTTGTCATCG<br>TCATCCTTGAATC-3' | 3xFLAG Reverse primer, 5' add stop codon<br>and 15 nt region complementary to<br>pCAMBIA1301 vector PmlI end |                                                                                         |
